# Supplementary material for: Case Series of 11 CDH1 Families (47 Carriers) Including Incidental Findings, Signet Ring Cell Colon Cancer and Review of the Literature
Source: MDPI journal article supplement (doi:10.3390/genes14091677), 2023-08-25

## Supplementary Materials

### Family 1 :

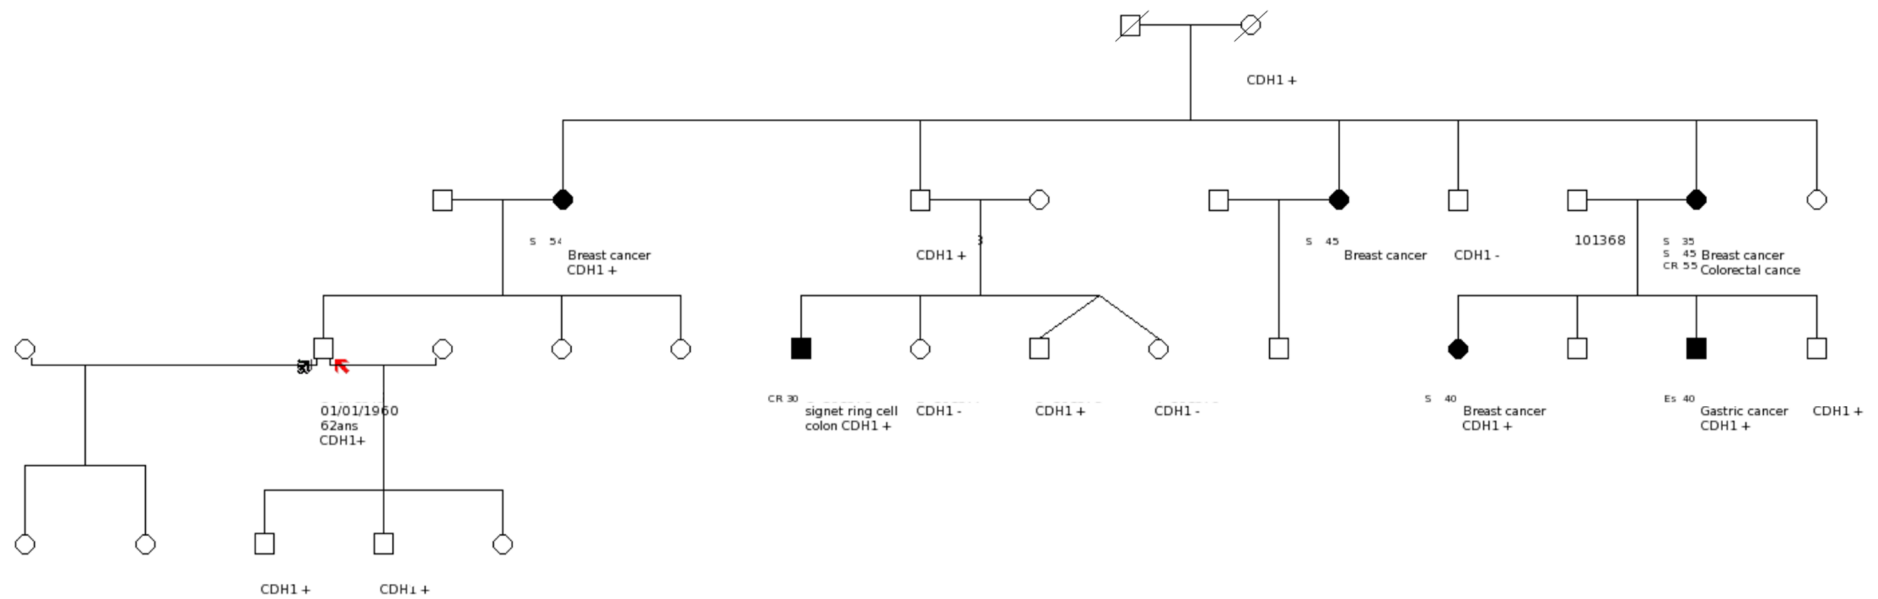

S : Breast cancer

Pr : Prostate cancer

ES : gastric cancer

LBC : lobular breast cancer

PM : lung cancer

CR : colorectal cancer

**Family 2 :**

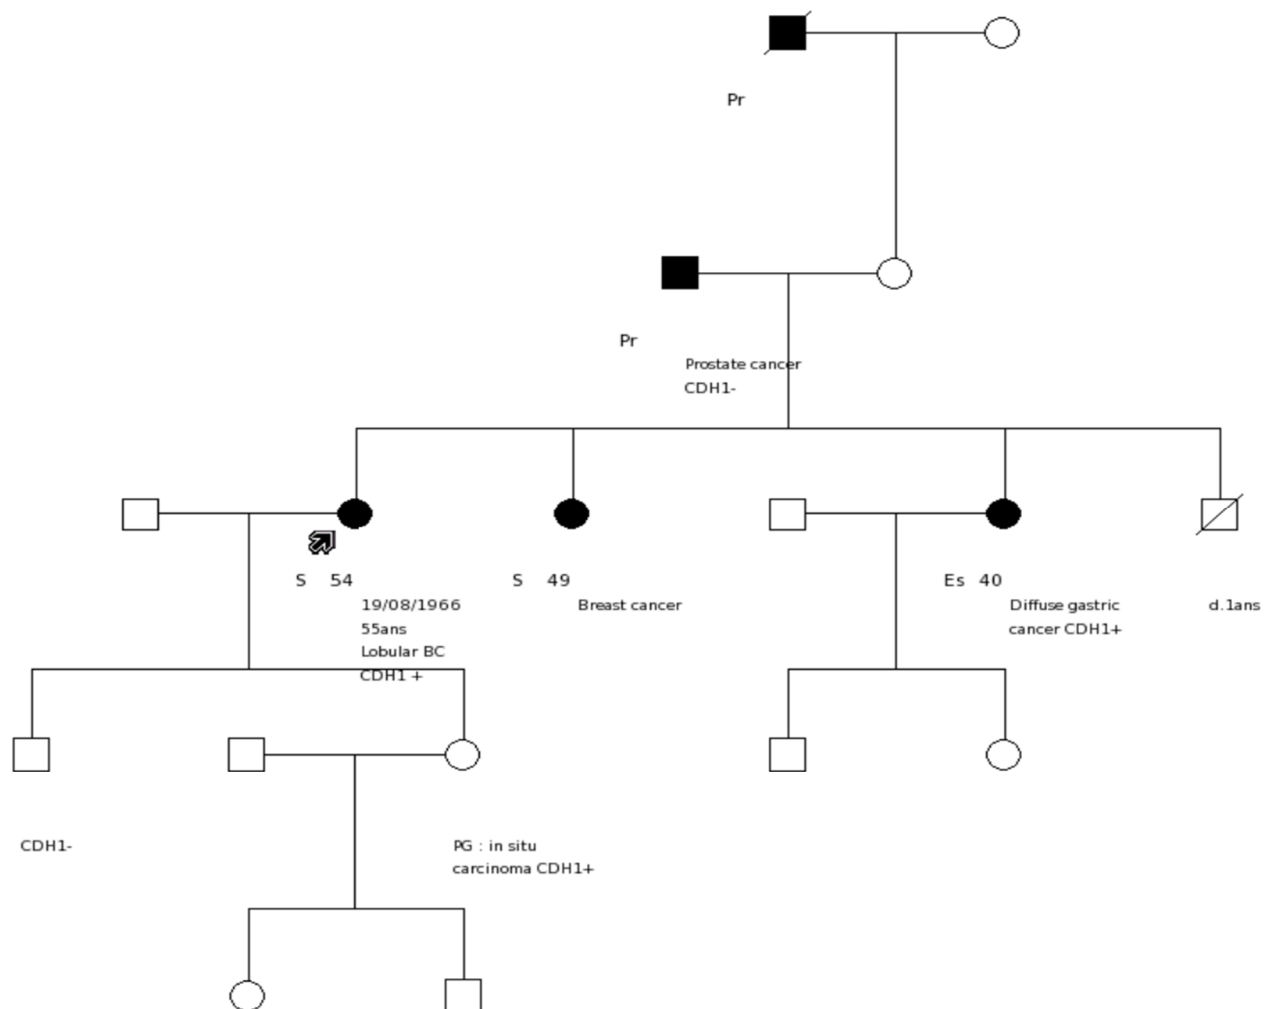

**Family 3 :**

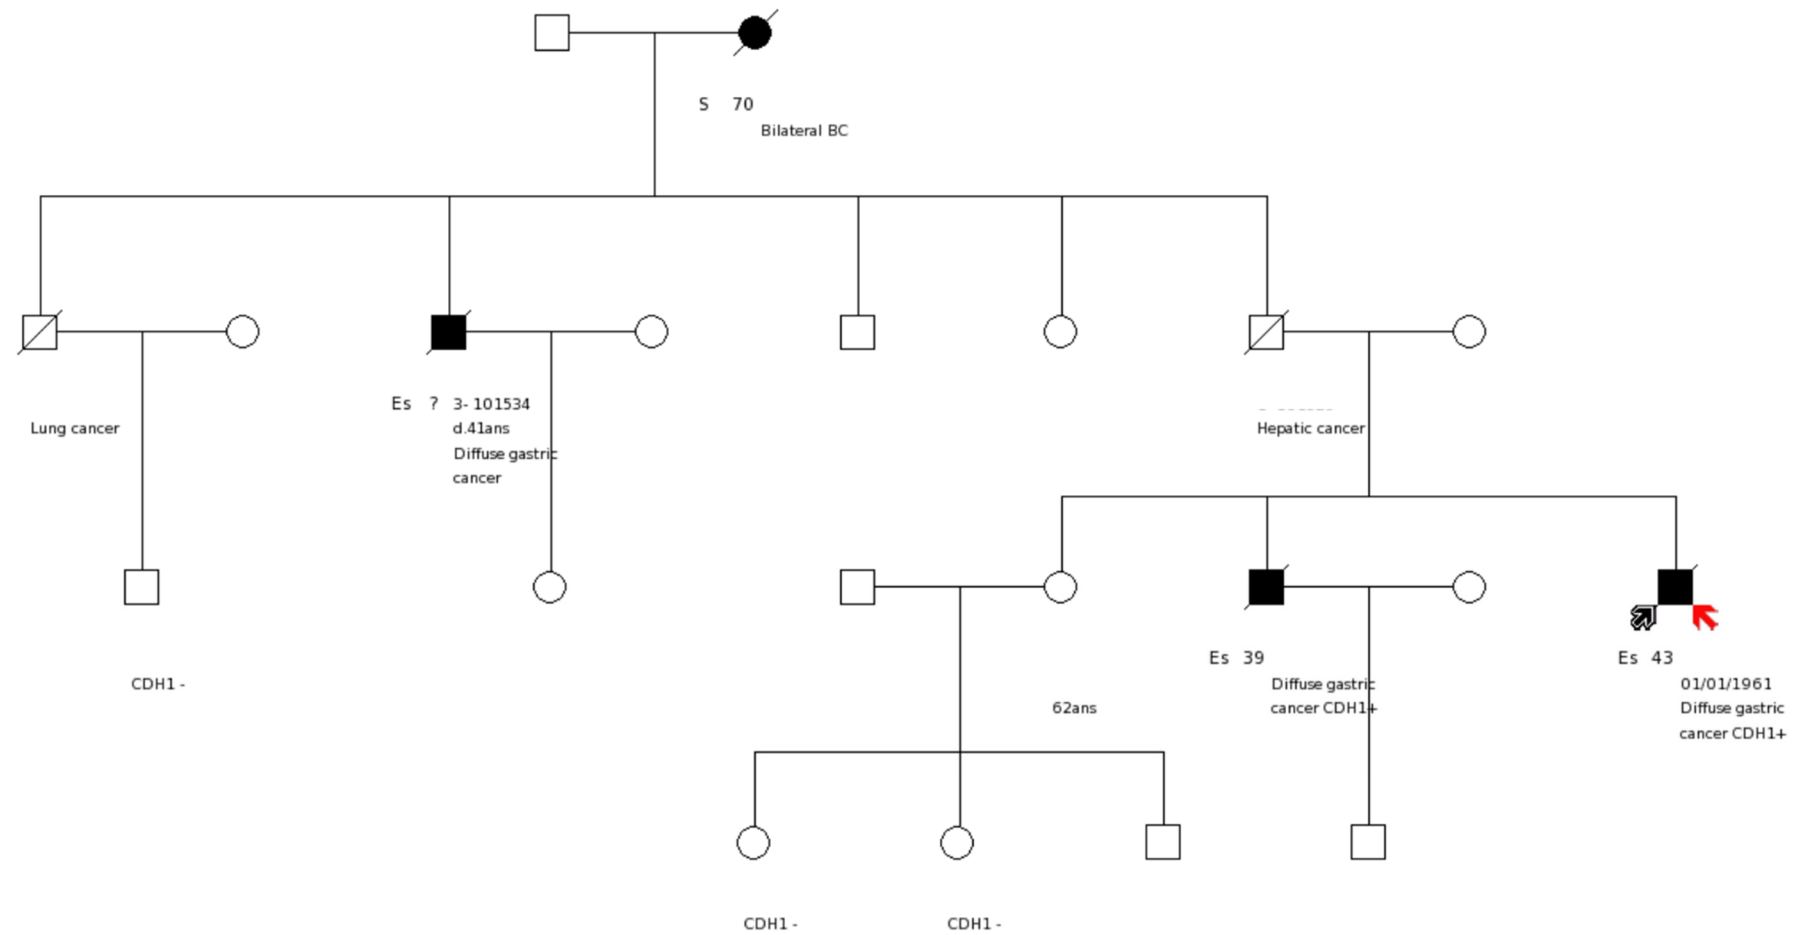

**Family 4 :**

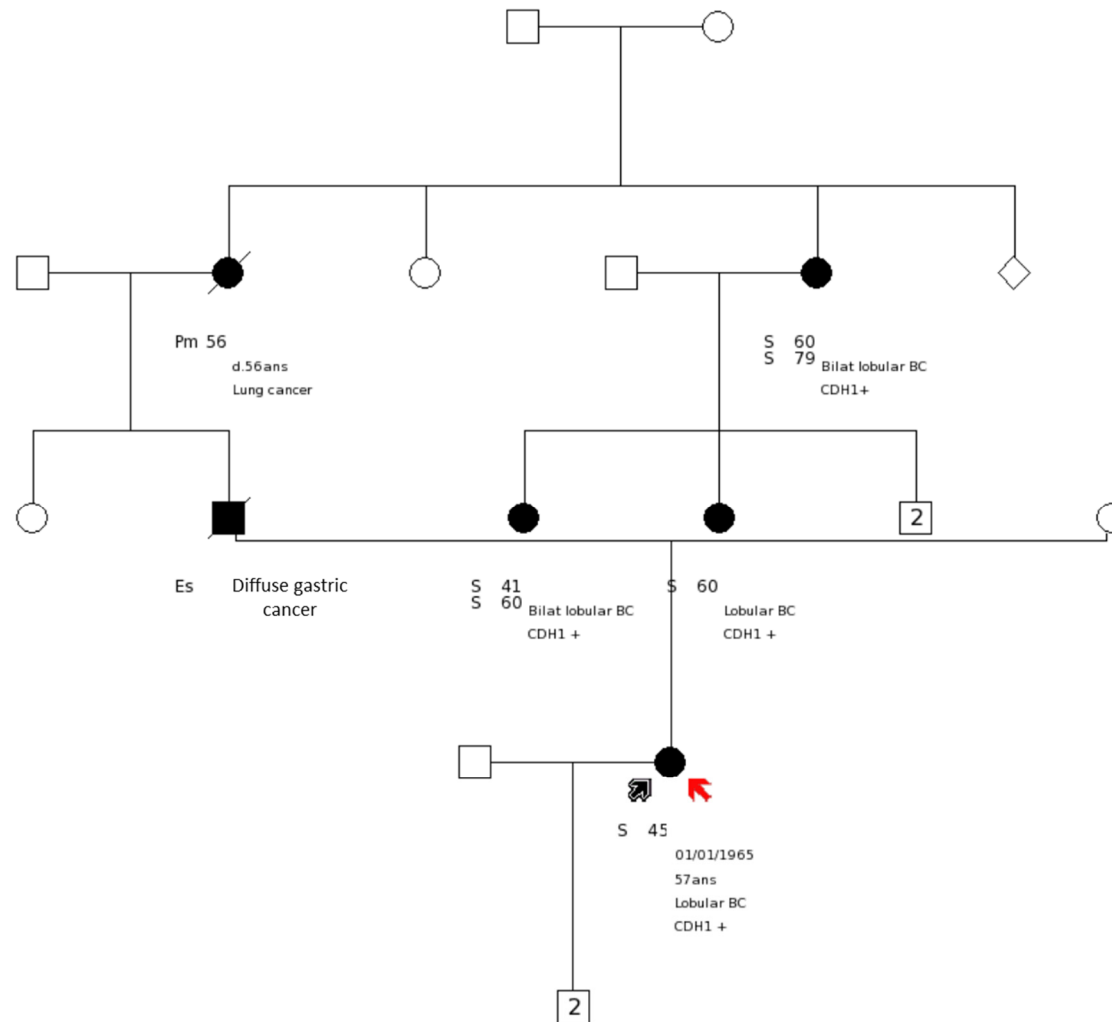

Family 5 :

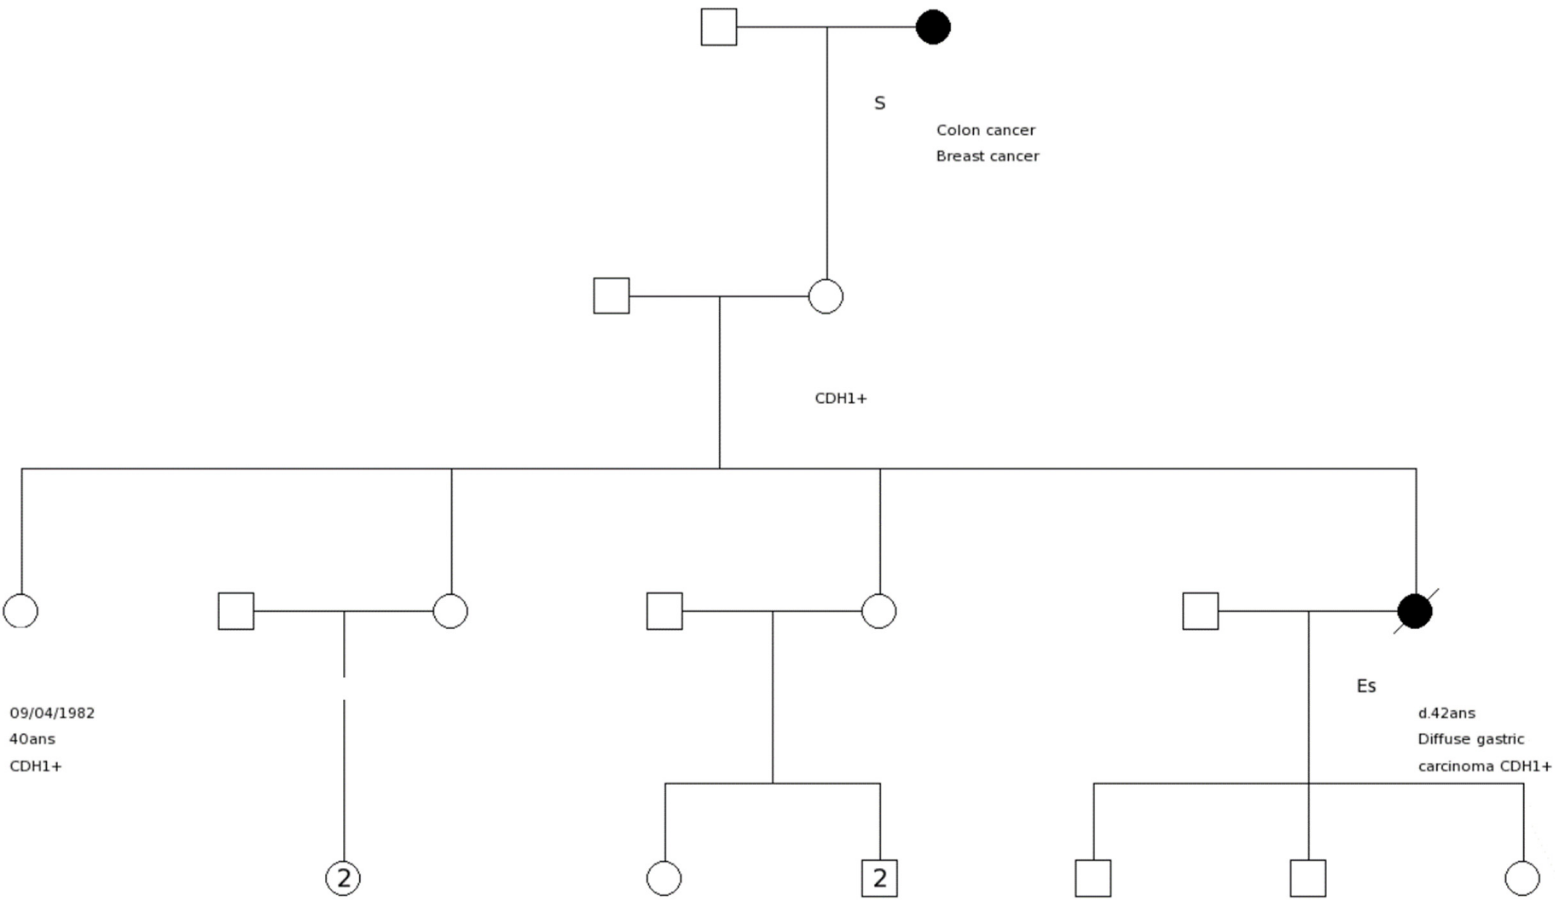

**Family 6 :**

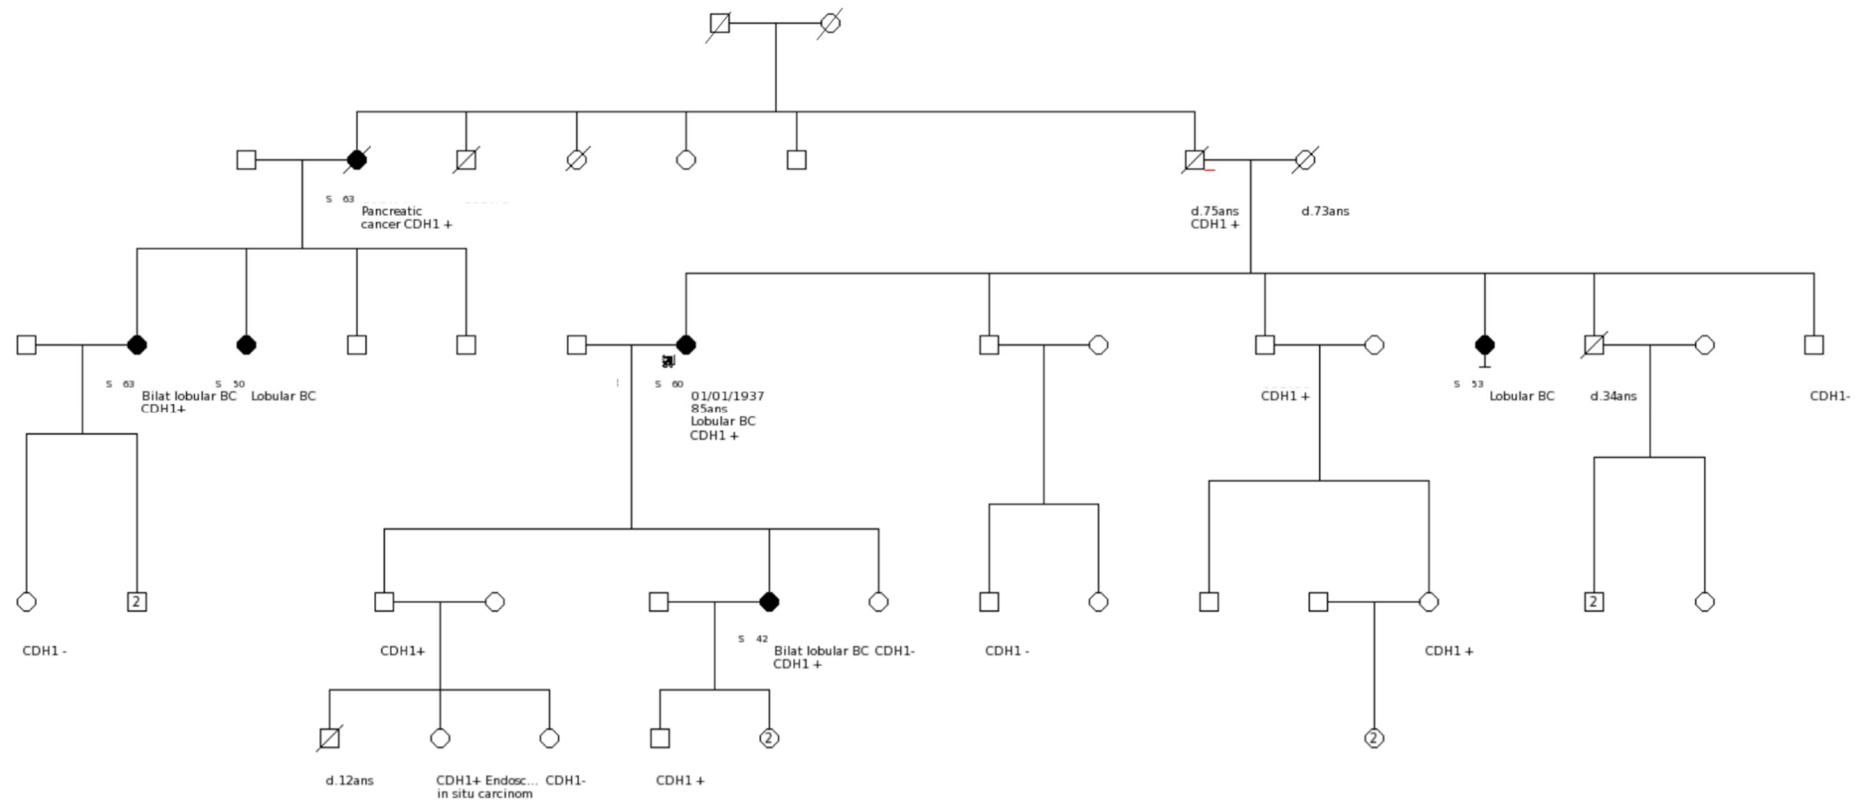

**Family 7 :**

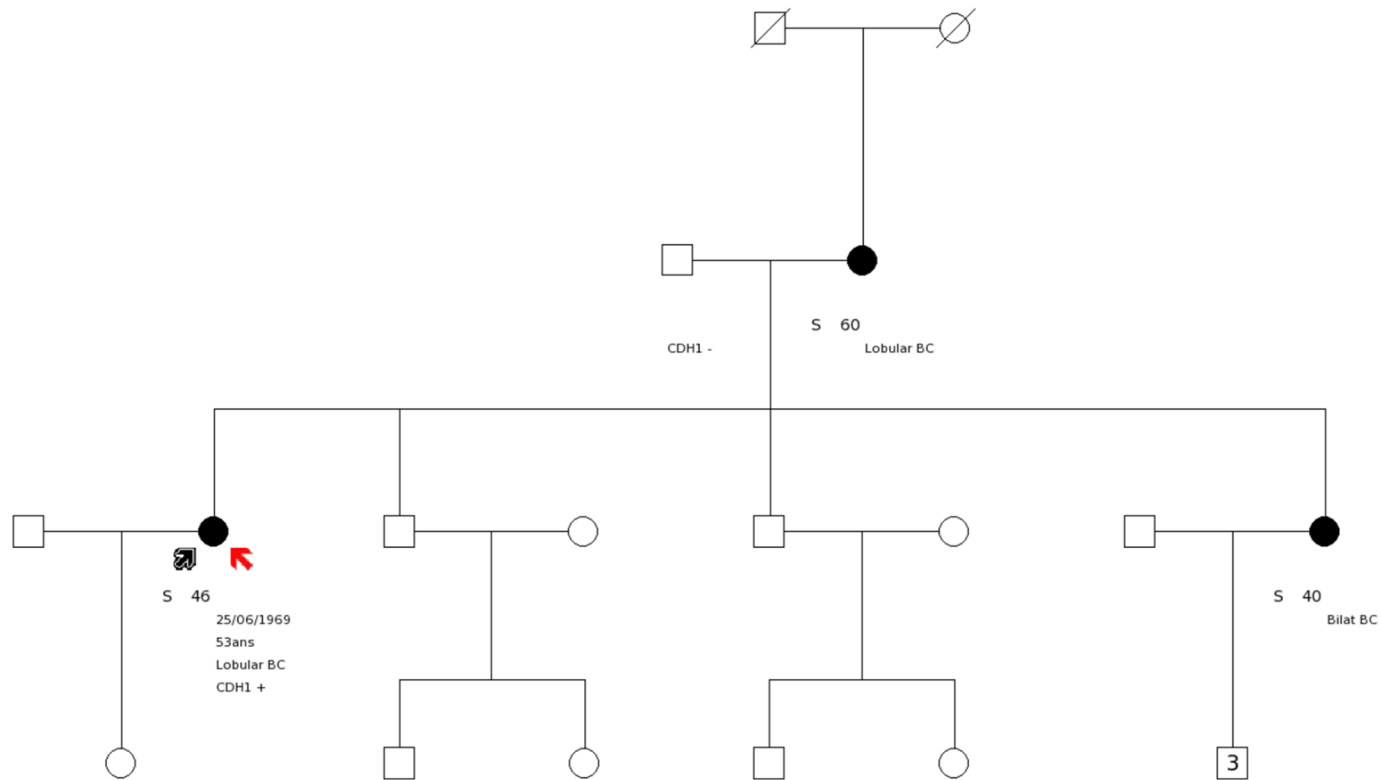

**Family 8 :**

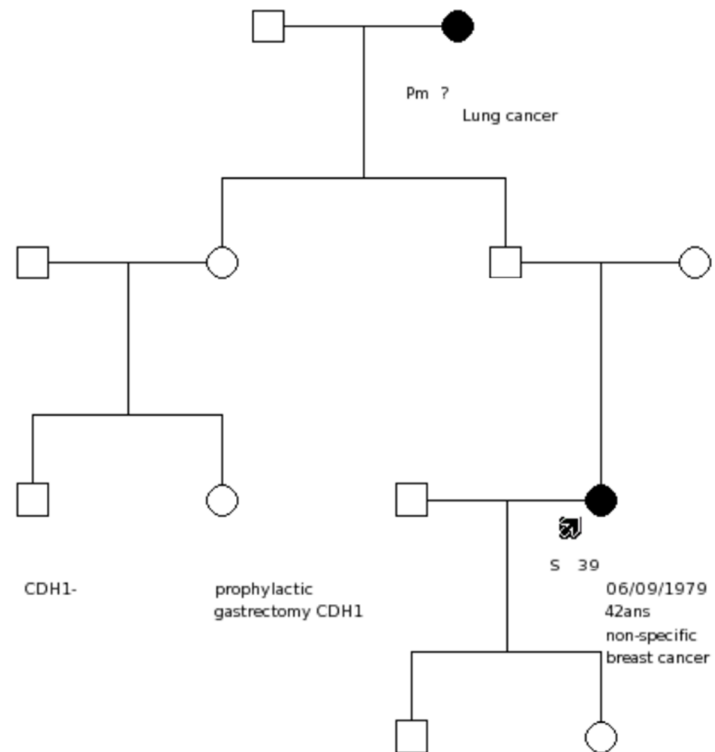



**Family 9**

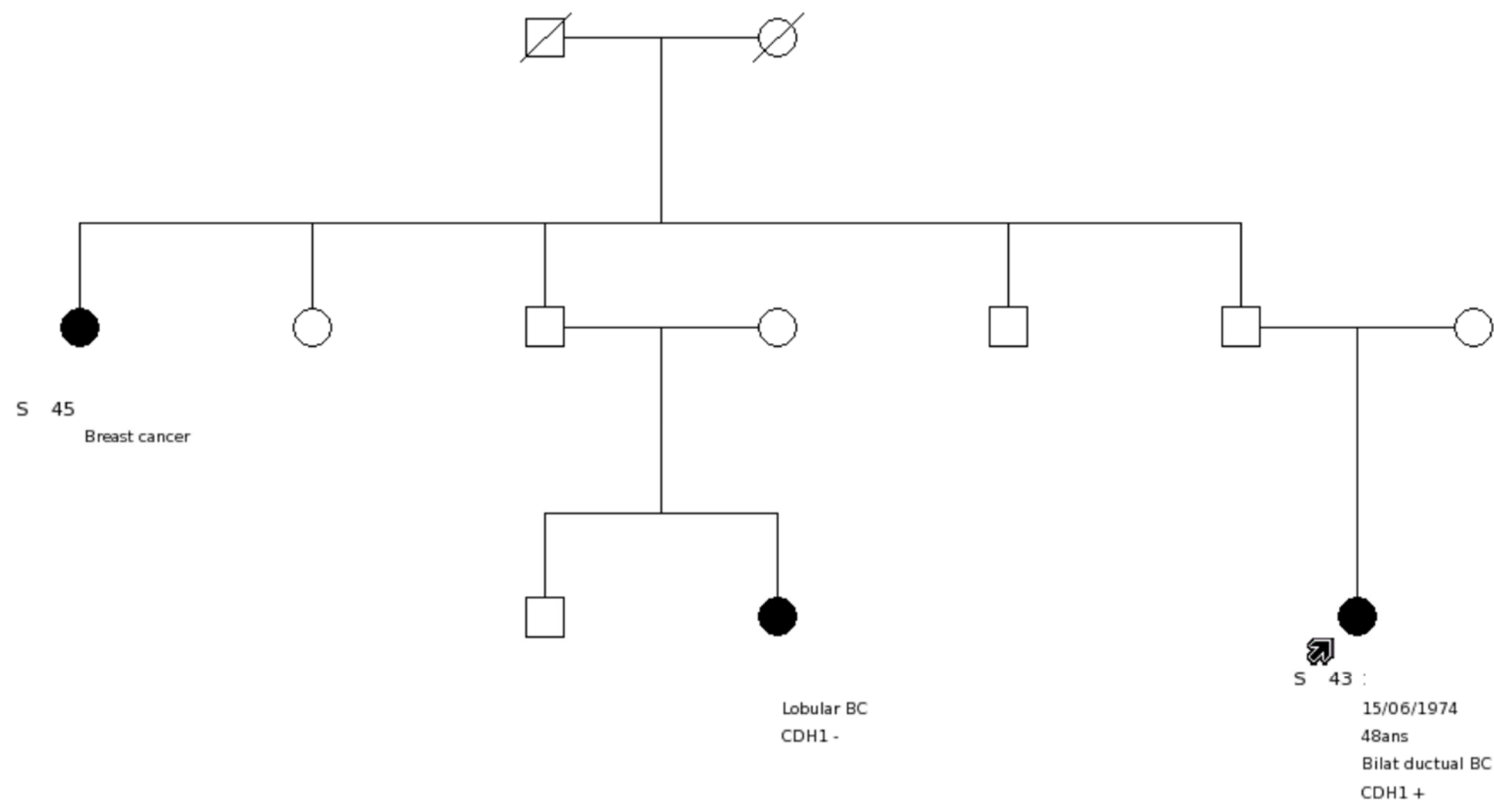

**Family 10 :**

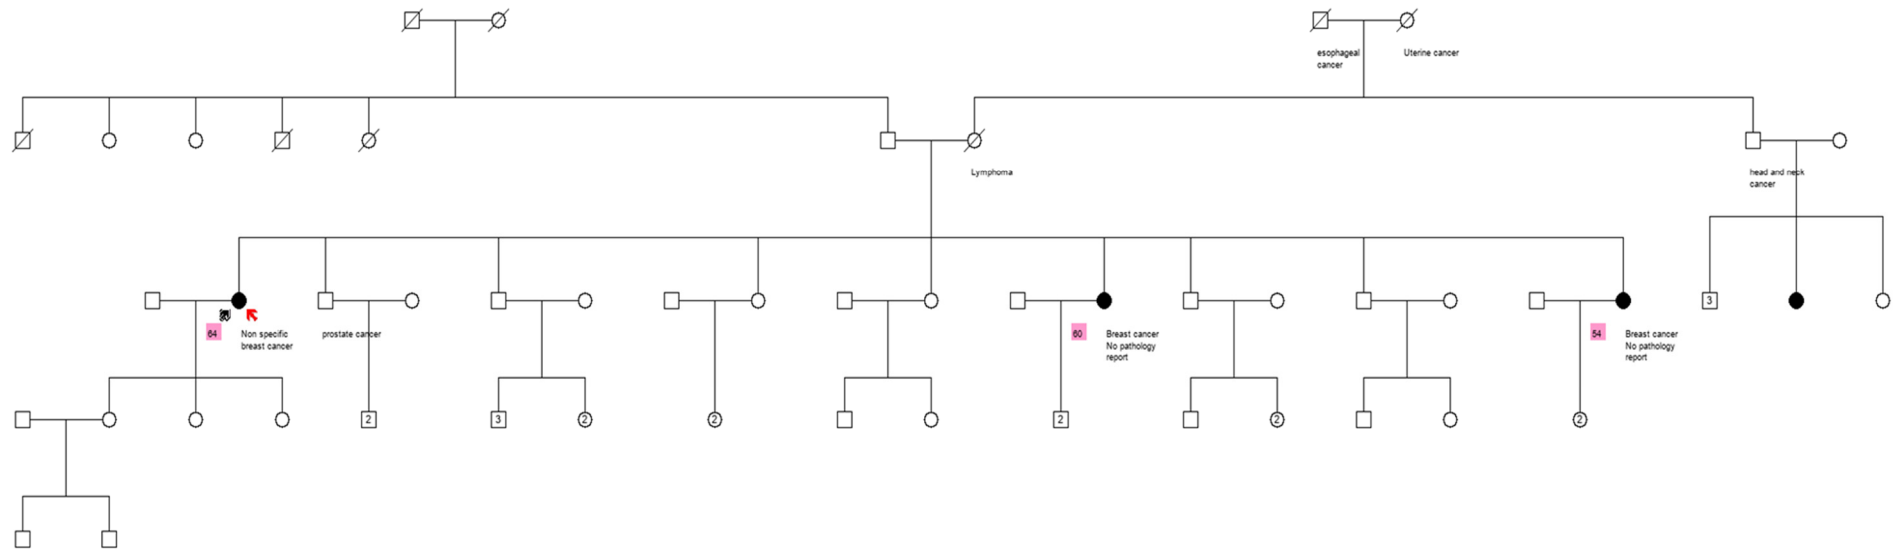

**Family 11 :**

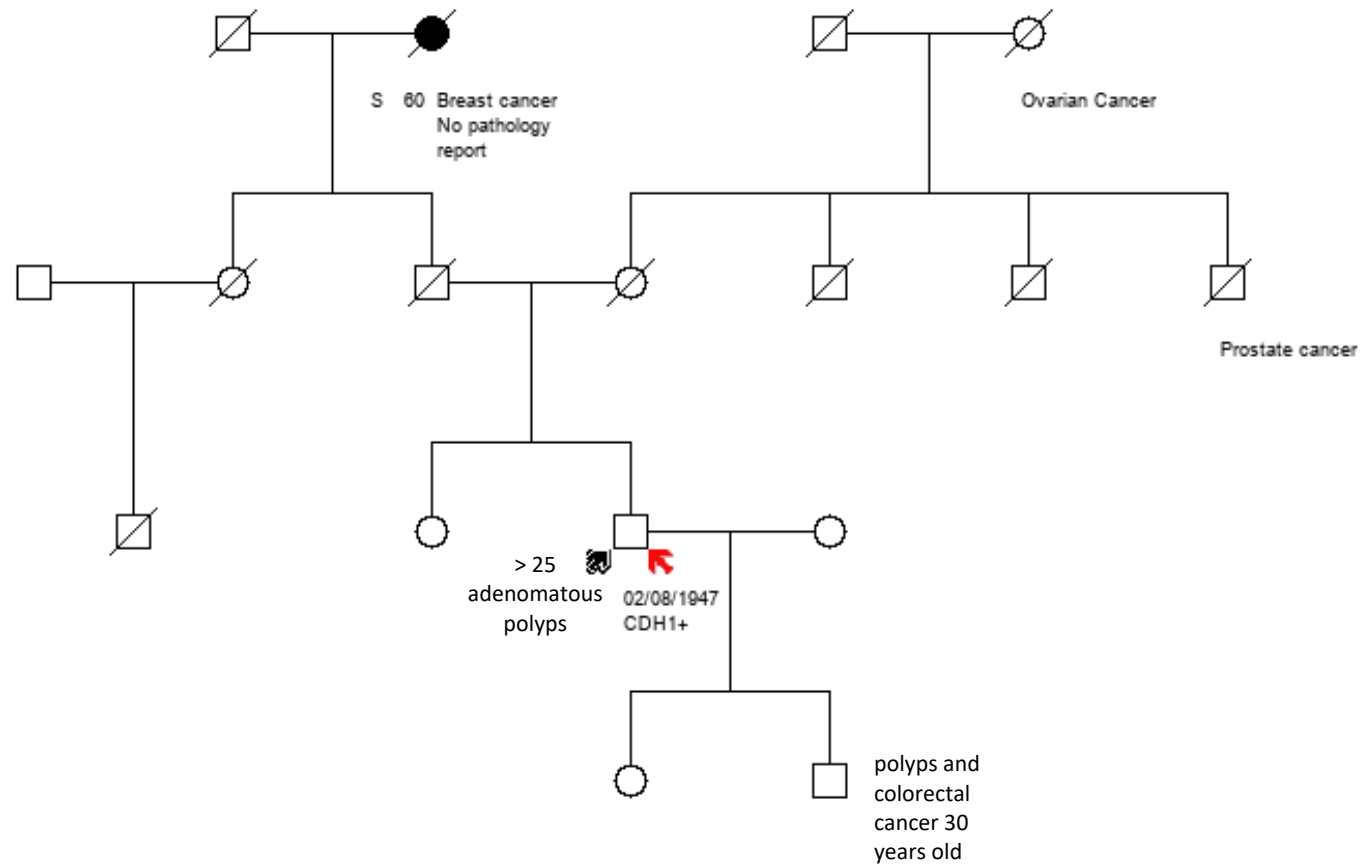

Supplement: s1 [file s1]
